# Supplementary material
Source: Springer Nature journal article supplement (https://www.springermedizin.de/resource/supplementary/12943_2010_753_MOESM9_ESM.pdf/9554740)

siRNA siRNA-  
PCMV6 PDCD4 ctrl PDCD4

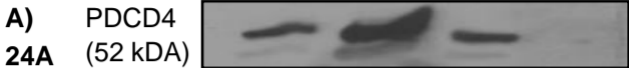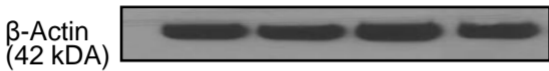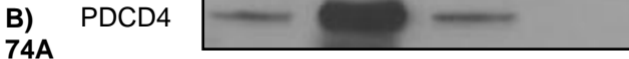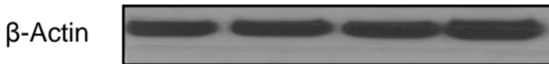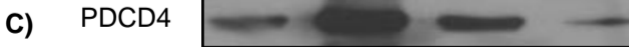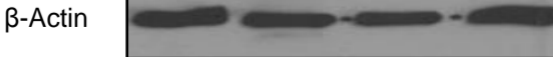

Supplement: MOESM9 [file 9554740]
